# Supplementary material for: Butylphenyl-functionalized palladium nanoparticles as effective catalysts for the electrooxidation of formic acid
Source: Royal Society of Chemistry journal article supplement (doi:10.1039/c1cc11235j), 2011-01-01
Supplement: c1cc11235j.pdf [file c1cc11235j.pdf]

Supplementary Information

## Butylphenyl-functionalized palladium nanoparticles as effective catalysts for the electrooxidation of formic acid

Zhi-You Zhou<sup>a,b</sup>, Xiongwu Kang<sup>a</sup>, Yang Song<sup>a</sup>, Shaowei Chen<sup>a,\*</sup>

<sup>a</sup> Department of Chemistry and Biochemistry, University of California, Santa Cruz, California 95064

<sup>b</sup> State Key Lab of Physical Chemistry of Solid Surfaces, Department of Chemistry, College of Chemistry and Chemical Engineering, Xiamen University, Xiamen 361005, China.

\*Corresponding author. Email: shaowei@ucsc.edu

### 1. Reagents and materials

Palladium chloride (PdCl<sub>2</sub>, 59% Pd, ACROS), 4-butylaniline (97%, Aldrich), sodium borohydride (NaBH<sub>4</sub>, 98%, ACROS), sodium nitrite (NaNO<sub>2</sub>, 98%, ACROS), fluoroboric acid (HBF<sub>4</sub>, 50 wt% in water, ACROS), toluene (HPLC grade, Fisher Scientific), tetrahydrofuran (THF, HPLC grade, Fisher Scientific), sulfuric acid (H<sub>2</sub>SO<sub>4</sub>, Extra pure, 96%, ACROS), and formic acid (HCOOH, 99%, ACROS) were used as received. A commercial Pd black catalyst was purchased from Aldrich (#205834). Water was supplied by a Barnstead Nanopure water system (18.3 MΩ·cm).

### 2. Synthesis of butylphenyl-stabilized Pd (Pd-BP) nanoparticles

PdCl<sub>2</sub> (17.7 mg, 0.1 mmol) was dissolved in hydrochloric acid (0.5 mL) under heating condition. After most of water was evaporated, the product of H<sub>2</sub>PdCl<sub>4</sub> was dissolved in THF (5 ml), and cooled with an ice-water bath. Butylphenyl diazonium was synthesized by following a literature protocol.<sup>1</sup> Briefly, to a beaker was added HBF<sub>4</sub> (0.5 mL) and 4-butylaniline (0.16 mL, 1 mmol). The solution was cooled in an ice-water bath, and stirred prior to the dropwise addition of a cooled NaNO<sub>2</sub> solution (69 mg, 1 mmol). After several minutes, the aqueous phase was removed, and the diazonium product was dissolved in ice-cold THF (20 mL). To the diazonium solution was added ice-cooled H<sub>2</sub>PdCl<sub>4</sub> and toluene (30 ml). A yellow solution was formed, so no phase transfer of PdCl<sub>4</sub><sup>2-</sup> from aqueous to organic phases was needed in the present method, as compared with the previous synthesis.<sup>2</sup> Under magnetic stirring, NaBH<sub>4</sub> (saturated solution in THF, 20 mL) was then added dropwise to the above yellow solution. The solution color changed gradually from yellow to brown-green, and finally to dark brown, indicating the formation of Pd nanoparticles. Subsequently, the solution was washed with 0.1 M H<sub>2</sub>SO<sub>4</sub> solution and water. After the solution was concentrated, the Pd nanoparticles were precipitated by ethanol, and further washed three times with ethanol to remove any excess of ligands and other impurities. Finally, the purified Pd nanoparticles were dissolved in toluene.

The exact Pd concentration in the final toluene solution was determined by a UV-Vis spectrophotometric method proposed by Morrow et al.<sup>3</sup> In this method, PdCl<sub>4</sub><sup>2-</sup> ions reacted with I<sup>-</sup> in HClO<sub>4</sub>, yielding a yellow-red PdI<sub>4</sub><sup>2-</sup> complex ions with an absorption band at 408 nm. Prior to spectrophotometric analysis, Pd-BP nanoparticles were dissolved in aqua regia to form PdCl<sub>4</sub><sup>2-</sup>, and the solution was carefully evaporated to a small volume in order to remove NO<sub>3</sub><sup>-</sup> ions (note that NO<sub>3</sub><sup>-</sup> must be removed completely; or else, it would oxidize I<sup>-</sup> to colorful I<sub>3</sub><sup>-</sup> during the formation of PdI<sub>4</sub><sup>2-</sup>).

### References

1. H. H. Yang and R. L. McCreery, *Anal. Chem.*, 1999, **71**, 4081.
2. D. Ghosh and S. W. Chen, *J. Mater. Chem.*, 2008, **18**, 755.
3. J. J. Morrow and J. J. Markham, *Anal. Chem.*, 1964, **36**, 1159.
